# Supplementary material
Source: MDPI journal article supplement (https://www.mdpi.com/2075-163X/14/1/66)
Supplement: s1 [file s1 › Table S1.xlsx]

## Sheet: sheet1
Rift	Sample No	latitude	longitude	Method	Initiation age (Ma)	Initiation rate (km/Myr)	Second activity age (Ma)	Second activity rate (km/Myr)	References
LPR	B270902-4	31.8	78.6	40Ar-39Ar Mica	16				13
	RT01-50	31.8	78.64	AFT	16	1.5			14
				monazite U-Pb in syn-	23				15
GMR	PK61307-2	30.43	81.44	ZHe	14	2.5±0.45			16
	GM-8	30.25	81.25	MAr	9				17
	HUM02-66	30.15	81.34	ZHe	14	1.65±0.3			16
	HUM02-10	30.04	81.81	ZHe	15	1.6±0.8			16
	HUM02-22	30	81.75	Monazite 232Th-208Pb	15				18
YR	YR1701-D28	31.25	82.2	AFT、 U-Pb	20		10		19
LGR	WW082609-06-2	31.61	83.55	AHe	10	1.75	5	1	20
	82309PK1	31.58	83.54	AHe	10	1	5	7	21
	SLW-HW-01	31	83.3	ZHe	16	1.2/3	8		22
	SLW-LK-01	31.27	83.56	ZHe			8		22
TKR	GG10	29.11	83.86	MAr	17	0.8			23
	A01	28.908	83.84	Depositional sequence	11		7		24
		28.7	83.93	Carbonate δ18O changing	11				25
	No. 1	28.5	84	40Ar-39Ar Mica	14				26
LKR				U-Pb zircon	16				27
				40Ar/39Ar,U-Pb zircon	14-15				28
GRR	T45-1	28.89	85.32	ZFT	10	0.58			29
KCR		28.88	86.48	Zircon U-Pb	19				30
	K2L172	28.77	86.47	AHe			4	0.64	1
	KC50	28.77	86.47	AHe	13		10		31
TYR	Xu	30.16	86.35	AHe	13	0.7	6		32
	SS16-23	30.5	86.5	AHe、AFT、 U-Pb	10		4		19
	12TYT7	30.73	86.48	AHe	14.5	0.3	5	0.7	33
SHG		33.17	88.84	MAr	13				34
XDR(south)	AD35	28.25	87.45	Zircon U-Pb	13				35
	T5D40	28.4	87.74	AHe	12	4	6		36
	T01-50	28.5	87.75	40Ar-39Ar Mica	13		8		37
		28.7	88	AHe、ZHe	14				38
	F_38_zr1	29.23	87.76	ZHe			4		39
		28.7	88	AHe、ZHe			10		38
	MJAD1	28.1	87.37	AHe			3	1	40
XDR(north)	Z05XIE82	29.73	88.29	ZHe	14		7	1.5	41
	05XID68	30.07	88.43	AHe	15		10	1	41
	04XIA01	30.27	88.64	AHe	17				41
	04XIA01	30.27	88.64	AHe			10	1.5	41
YGR(north)	6R2a	30.61	91.19	SAr			5		42
	P38B24	30.23	90.3	BAr			8		43
		30.09	90.54	AFT			8		44
		30.43	90.5	K-feldspar 40Ar-39Ar			8	1.26	45
YGR(south)	IE26	28.45	90.33	Monazite 232Th/208Pb	10				46
	YD03/04	28.2572	89.6857	Fault gouge 40Ar-39Ar	13				47
		28.83	92	ESR、TL	15				48
	02-101	27.78	89.36	Paleomagnetism, illite 40Ar-39Ar	13				49
	FB111	27.7	89.33	Zircon U-Pb	14				12
				AFT、AHe	11-13				50
		28.8	90	AHe			7		51
	YD03/04	28.2572	89.6857	Fault gouge 40Ar-39Ar			9		47
	S2262-1	27.96	89.36	ESR、OSL	15				48
CWR					10-12				52
	ZD01	28.78	92.05	AFT、 U-Pb	13				19
		28.83	92	ESR、TL	15				48
	CN	27.916	91.9	AHe、Ar-Ar			3	2.29	53

## Sheet: sheet2
location	longitude	latitude	End time of ductile shearing (Ma)	end time of brittle slip (Ma)	References
Zanskar			21		54
sutlej			16		55
shivling			21		56
Manaslu			16		57
Langtang			17.3		58
Everest				14.4	59
				13	60
Dinggye	87.6667	28.1667	16-15	13.6-11	61
	86.6672	28.3553	16-18		62
	87.5	28.175		13	40
	87.5003	28.25		13	35
				13	63
Sa’er			15	11	61
			13.6		64
Sikkim			13		64
West Bhutan	89.75	28			65
Bhutan			11		66, 67, 68
NW Bhutan			11-10		66, 69, 70, 71, 72
	89.33	27.7		14	12
