# Supplementary material
Source: MDPI journal article supplement (https://www.mdpi.com/2075-163X/14/1/66)
Supplement: s1 [file s1 › Table S2.xlsx]

## Sheet: Sheet1
SAMPLE	LON	LAT	HEIGHT	AHE	DAHE	AFT	DAFT	ZHE	DZHE	ZFT	DZFT	BAR	DBAR	MAR	DMAR	References
XTK61	89.0552	27.7835	4809			10.96	0.7			13.57	0.61					this study
XTK62	89.0423	27.7868	4686			8.03	0.47
XTK63	89.0248	27.7875	4581			9.23	0.56
XTK64	89.0117	27.7906	4482			7.52	0.47
XTK65	89.0044	27.7929	4386			7.35	0.47
XTK-PL2	88.9974	27.7952	4285			6.16	0.4
XTK-KB-1	88.974	27.7573	3855			5.68	0.37
05YD-03	88.9548	27.3687	3149			7	0.5					11.3	0.6			81
05YD-08	88.9762	27.3769	2721			8	0.5					11	0.4	13.9	0.8
Y1	88.9509	27.4081	2836							10.6	0.8					82
Y2	88.9331	27.4209	2841	5.9	1					8.4	0.9
Y3	88.9239	27.4378	2868	6.6	0.7					10	0.9
Y4	88.9098	27.4344	3495							9.7	1.3
Y5	88.9118	27.4291	3401	7.7	0.4					10	0.7
Y6	88.9147	27.4275	3240	7	0.5					12	1.2
Y7	88.9184	27.4359	3067	6.4	1.6					9.2	1
Y8	88.9164	27.4526	2910	6.2	2.3					10.2	1
Y9	88.9063	27.486	2955	7	0.4					9.4	0.8
Y10	88.9032	27.5038	3028	4.2	0.4					9.4	1.4
Y11	88.9147	27.5224	3129	5.5	0.7					11.5	1.4
Y12	88.9266	27.5384	3181							9.1	1.3
Y13	88.9305	27.5551	3258							8.2	0.7
Y14	88.915	27.5699	3296							9	0.7
Y15	88.909	27.5884	3413	4.5	1.5					8.8	1.1
Y17-3	88.9276	27.6229	3693	7.3	0.6					12.1	0.9
Y18-2	88.9766	27.7534	3990	10.6	0.4					13.4	1
Y19	88.9993	27.7912	4256	11.1	0.7					14	1.7
KY1-5	88.8828	27.4273	3854			5.8	0.4	6.3	0.3							83
KY1-11	88.9134	27.4309	3219			5.9	0.3
KY1-12	88.9147	27.4339	3112			4.5	0.2	5.6	0.3
KY1-13	88.9185	27.4403	3031			4.3	0.1
KY1-7	88.9013	27.4381	3639					6.8	0.3
KY1-9	88.9097	27.4377	3464					6.6	0.3
KY1-14	88.9229	27.4433	2871					6.4	0.4
KY4-4-1	88.9766	27.7517	4039									14.9	0.1
